# Supplementary material for: Thermophilisation of Afromontane forest stands demonstrated in an elevation gradient experiment
Source: Copernicus journal article supplement (doi:10.5194/bg-20-5125-2023), 2023-12-20
Supplement: Supplementary file 1 [file bg-20-5125-2023-supplement.pdf]

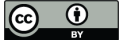

*Supplement of*

## **Thermophilisation of Afromontane forest stands demonstrated in an elevation gradient experiment**

**Bonaventure Ntirugulirwa et al.**

*Correspondence to:* Bonaventure Ntirugulirwa (ntirugulirwabonaventure@gmail.com) and Göran Wallin (goran.wallin@bioenv.gu.se)

The copyright of individual parts of the supplement might differ from the article licence.

## Table of supplement contents

**Table S1.** Information about the germplasm material and propagation in the nursery prior to plantation at the sites.

**Table S2.** Stem base diameter (5 cm above soil) at planting in Dec 2017/Jan 2018.

**Table S3.** Stem height at planting in Dec 2017/Jan 2018.

**Table S4.** Classification of species into the successional groups (SG) early (ES) and late successional (LS) and the references supporting the classification.

**Table S5.** P-values and total degrees of freedom (df Tot) of one-way ANOVA for species-specific site effects on  $D_{\text{base}}$ ;  $h$ ; D-RGR<sub>D10-25</sub>; D-RGR<sub>D10-25</sub>, H-RGR<sub>H75-100</sub>; H-RGR<sub>H250-300</sub>; stems#, and tree mortality.

**Table S6.** Number of individuals recorded dead at each tri-monthly census of each species and site.

**Figure S1.** Schematic topographic map of Rwanda with the sites of the TRopical Elevation Experiment in Rwanda (Rwanda TREE)

**Figure S2.** Site map and experimental design at the high elevation site (Sigira).

**Figure S3.** Site map and experimental design at the mid elevation site (Rubona).

**Figure S4.** Site map and experimental design at the low elevation site (Makera).

**Figure S5.** The relation between height and base diameter and the relative growth rate (RGR) for height (H-RGR) and base diameter (D-RGR) in relation to height and base diameter, respectively, for all 20 species measured tri-monthly over two years at all three sites.

**Figure S6 a-t.** The development of the stem base diameter measured every third month over two years and the relative growth rate (RGR) between measurement intervals for 20 species grown at three sites along an elevation gradient

**Figure S7 a-t.** The development of the stem height measured every third month over two years and the relative growth rate (RGR) between measurement intervals for 20 species grown at 3 sites along an elevation gradient

**Table S1.** Information about the germplasm material and propagation in the nursery prior to plantation at the sites.

| Species:<br>Scientific name       | Germplasm material: |                              |                                        |                       | Propagation in Nursery:  |                                  |                                         |                            |                                 |                                 |                                       |                                          |                                      |
|-----------------------------------|---------------------|------------------------------|----------------------------------------|-----------------------|--------------------------|----------------------------------|-----------------------------------------|----------------------------|---------------------------------|---------------------------------|---------------------------------------|------------------------------------------|--------------------------------------|
|                                   | Code                | Prove-<br>nance <sup>1</sup> | Location of<br>collection <sup>1</sup> | Date of<br>collection | No of<br>mother<br>trees | Type of<br>material <sup>2</sup> | 1000-seed<br>weight <sup>3</sup><br>(g) | Moisture<br>content<br>(%) | Start of<br>propagation<br>date | Date of<br>transplanta-<br>tion | Days in<br>seed-<br>beds <sup>4</sup> | Final<br>no of<br>survivals <sup>5</sup> | Survival<br>rate <sup>6</sup><br>(%) |
| <i>Afroparpus falcatus</i>        | Afa                 | NYU                          | RUH                                    | 2016-06-20            | 10-15                    | Seed                             | 5 700                                   | 25                         | 2016-08-03                      | 2016-11-08                      | 97                                    | 420                                      | 100                                  |
| <i>Albizia gummifera</i>          | Agu                 | NYU                          | RUB                                    | 2017-08-25            | 1                        | Seed                             | 80                                      | 6                          | 2017-08-31                      | 2017-09-15                      | 15                                    | 308                                      | 49                                   |
| <i>Bridelia bridelifolia</i>      | Bbr                 | NYU                          | NYU                                    | 2016-07-20            | 1-5                      | Seed                             | 67                                      | 23                         | 2016-08-03                      | 2016-09-07                      | 35                                    | 692                                      | 84                                   |
| <i>Bridelia micrantha</i>         | Bmi                 | RUB                          | RUB                                    | 2016-09-14            | 1-5                      | Seed                             | 50                                      | 25                         | 2016-10-03                      | 2016-11-09                      | 37                                    | 374                                      | 100                                  |
| <i>Carapa grandiflora</i>         | Cgr                 | NYU                          | NYU                                    | 2016-06-30            | 10-15                    | Seed                             | 28 600                                  | 32                         | 2016-08-03                      | 2016-11-10                      | 99                                    | 528                                      | 100                                  |
| <i>Chrysophyllum gorungosanum</i> | Cgo                 | NYU                          | RUH                                    | 2016-11-21            | 5-10                     | Wildlings                        | 600                                     |                            | 2016-11-21                      | 2016-11-21                      |                                       | 378                                      | 100                                  |
| <i>Croton megalocarpus</i>        | Cme                 | NYU                          | RUB                                    | 2016-01-10            | 10-15                    | Seed                             | 800                                     | 8                          | 2016-09-22                      | 2016-10-10                      | 18                                    | 562                                      | 99                                   |
| <i>Dombeya torrida</i>            | Dto                 | NYU                          | RUH                                    | 2016-11-24            | 20-30                    | Cuttings                         | 4                                       |                            | 2016-11-24                      | 2016-11-24                      |                                       | 630                                      | 100                                  |
| <i>Entandrophragma excelisum</i>  | Eex                 | NYU                          | RUH                                    | 2016-07-11            | 5-10                     | Wildlings                        | 634                                     |                            | 2016-11-07                      | 2016-11-07                      |                                       | 410                                      | 100                                  |
| <i>Faurea saligna</i>             | Fsa                 | NYU                          | NYU                                    | 2016-04-02            | 1-5                      | Seed                             | 4                                       | 4                          | 2016-08-03                      | 2016-10-19                      | 77                                    | 304                                      | 87                                   |
| <i>Ficus thonningii</i>           | Fth                 | NYU                          | NYU                                    | 2016-09-20            | 1                        | Cuttings                         | 11                                      |                            | 2016-09-20                      | 2016-09-20                      |                                       | 1047                                     | 97                                   |
| <i>Harungana madagascariensis</i> | Hma                 | RUB                          | RUH                                    | 2016-04-02            | 10-20                    | Seed                             | 11                                      | 10                         | 2016-08-16                      | 2016-09-07                      | 22                                    | 1050                                     | 71                                   |
| <i>Harungana montana</i>          | Hmo                 | NYU                          | NYU                                    | 2016-10-05            | 1-5                      | Seed                             | 13                                      | 10                         | 2016-08-16                      | 2016-11-10                      | 86                                    | 352                                      | 90                                   |
| <i>Macaranga kilimandscharica</i> | Mki                 | NDI                          | NDI                                    | 2017-05-30            | 5-10                     | Seed                             | 60                                      | 15                         | 2017-07-01                      | 2017-08-04                      | 34                                    | 698                                      | 93                                   |
| <i>Maesa lanceolata</i>           | Mla                 | NYU                          | NYU                                    | 2016-06-20            | 1-5                      | Seed                             | 9                                       | 6                          | 2016-08-03                      | 2016-10-27                      | 85                                    | 454                                      | 98                                   |
| <i>Markhamia lutea</i>            | Mlu                 | NYU                          | RUB                                    | 2016-01-06            | 1-5                      | Seed                             | 40                                      | 10                         | 2016-08-03                      | 2016-09-14                      | 42                                    | 1679                                     | 97                                   |
| <i>Newtonia buchananii</i>        | Nbu                 | NYU                          | NYU                                    | 2016-10-07            | 1-5                      | Seed                             | 352                                     | 33                         | 2016-09-13                      | 2016-10-30                      | 47                                    | 632                                      | 65                                   |
| <i>Polyscias fulva</i>            | Pfu                 | NYU                          | NYU                                    | 2016-07-20            | 1-5                      | Seed                             | 11                                      | 17                         | 2016-08-03                      | 2016-12-02                      | 121                                   | 326                                      | 100                                  |
| <i>Prunus africana</i>            | Paf                 | NYU                          | NYU                                    | 2017-04-28            | 1                        | Seed                             | 200                                     | 19                         | 2017-04-29                      | 2017-05-17                      | 18                                    | 1102                                     | 92                                   |
| <i>Syzgium guineense</i>          | Sgu                 | NYU                          | NYU                                    | 2016-10-18            | 1-5                      | Wildlings                        | 367                                     |                            | 2016-10-20                      | 2016-10-20                      |                                       | 546                                      | 85                                   |

<sup>1</sup>NDI, Ndiz mountain; NYU, Nyungwe tropical montane forest; RUB, Rubona research station; RUH, Ruhunde arboretum; All sites is in Rwanda.

<sup>2</sup>Wildlings are naturally regenerated seedlings

<sup>3</sup>Litterature values

<sup>4</sup>Only Afa seeds require pretreatment (scarification & soaking in Cold water for 24 h)

<sup>5</sup>Out of these 270 individual were radomly selected for plantation at the sites

<sup>6</sup>Survival of plants from prick out to selection for plantation

**Table S2.** Stem base diameter (5 cm above soil) at planting in Dec 2017/Jan 2018. Mean and standard deviations as well as P-values from one-way ANOVA tests are calculated on plot means (n=18) based on five individuals, i.e. 90 trees per species and site. All individuals within species were randomly selected from the nursery. Full name of species is given in Table S1. Different letters for sites indicate significant differences (P<0.05).

| Species          | HE          |    | ME          |    | LE          |    | P-value          | ME        | LE        |
|------------------|-------------|----|-------------|----|-------------|----|------------------|-----------|-----------|
|                  | Mean        | SD | Mean        | SD | Mean        | SD |                  | (% of HE) | (% of HE) |
| Afa              | 4.6 ± 0.5   |    | 4.9 ± 0.4   |    | 4.8 ± 0.7   |    | 0.31             | 6         | 5         |
| Agu              | 1.0 ± 0.0   |    | 1.0 ± 0.1   |    | 1.0 ± 0.0   |    | 0.77             | 1         | 0         |
| Bbr              | 4.4 ± 0.3 a |    | 5.0 ± 0.4 b |    | 4.3 ± 0.4 a |    | <b>&lt;0.001</b> | 14        | -2        |
| Bmi              | 4.5 ± 0.4 a |    | 4.5 ± 0.4 a |    | 4.2 ± 0.4 b |    | <b>0.010</b>     | 0         | -8        |
| Cgo              | 3.0 ± 0.5   |    | 2.9 ± 0.6   |    | 3.0 ± 0.5   |    | 0.92             | -2        | 0         |
| Cgr              | 7.7 ± 0.9   |    | 7.8 ± 0.8   |    | 7.5 ± 0.8   |    | 0.49             | 1         | -3        |
| Cme              | 4.0 ± 0.2   |    | 3.9 ± 0.3   |    | 4.0 ± 0.3   |    | 0.71             | -2        | 0         |
| Dto              | 9.6 ± 1.4   |    | 9.0 ± 1.3   |    | 8.9 ± 1.7   |    | 0.38             | -6        | -7        |
| Eex              | 8.5 ± 1.4   |    | 8.8 ± 1.6   |    | 8.7 ± 1.6   |    | 0.78             | 4         | 2         |
| Fsa              | 2.9 ± 0.5   |    | 3.1 ± 0.6   |    | 3.4 ± 0.6   |    | 0.06             | 7         | 16        |
| Fth <sup>1</sup> | 14.2 ± 3.3  |    | 14.8 ± 2.3  |    | 13.9 ± 2.3  |    | 0.61             | 4         | -2        |
| Hma              | 4.7 ± 0.5   |    | 4.8 ± 0.5   |    | 4.5 ± 0.5   |    | 0.15             | 1         | -6        |
| Hmo              | 5.2 ± 0.6   |    | 5.1 ± 1.0   |    | 5.4 ± 0.4   |    | 0.37             | -3        | 4         |
| Mki              | 1.3 ± 0.2   |    | 1.3 ± 0.3   |    | 1.3 ± 0.2   |    | 0.99             | 0         | -1        |
| Mla              | 5.4 ± 0.3   |    | 5.5 ± 0.5   |    | 5.5 ± 0.3   |    | 0.76             | 2         | 1         |
| Mlu              | 4.3 ± 0.4   |    | 4.3 ± 0.4   |    | 4.3 ± 0.3   |    | 0.96             | -1        | -1        |
| Nbu              | 3.1 ± 0.5   |    | 3.1 ± 0.5   |    | 3.2 ± 0.5   |    | 0.83             | 1         | 3         |
| Paf              | 3.4 ± 0.4   |    | 3.3 ± 0.3   |    | 3.4 ± 0.4   |    | 0.56             | -4        | -1        |
| Pfu              | 4.6 ± 0.6   |    | 4.6 ± 0.7   |    | 4.2 ± 0.4   |    | 0.052            | 0         | -9        |
| Sgu              | 4.3 ± 0.3 a |    | 4.7 ± 0.4 b |    | 4.3 ± 0.6 a |    | <b>0.018</b>     | 10        | 2         |

<sup>1</sup>The diameter measured was of the cutting (see Table S1) and not of the secondary shoot.

**Table S3.** Stem height at planting in Dec 2017/Jan 2018. Mean and standard deviations as well as P-values from one-way ANOVA are calculated on plot means (n=18) based on 5 individuals, i.e. 90 trees per species and site. All individuals within species were randomly selected from the nursery. Full name of species is given in Table S1. Different letters for sites indicate significant differences (P<0.05).

| Species | HE          |    | ME          |    | LE          |    | P-value      | ME<br>(% of<br>HE) | LE<br>(% of<br>HE) |
|---------|-------------|----|-------------|----|-------------|----|--------------|--------------------|--------------------|
|         | Mean        | SD | Mean        | SD | Mean        | SD |              |                    |                    |
| Afa     | 40.5 ± 5.6  |    | 43.8 ± 5.6  |    | 41.8 ± 5.0  |    | 0.19         | 8                  | 3                  |
| Agu     | 5.2 ± 0.5   |    | 5.0 ± 0.5   |    | 5.0 ± 0.4   |    | 0.63         | -2                 | -3                 |
| Bbr     | 54.0 ± 3.9  |    | 52.8 ± 2.1  |    | 55.1 ± 2.4  |    | 0.06         | -2                 | 2                  |
| Bmi     | 54.2 ± 4.0  |    | 54.0 ± 4.2  |    | 54.1 ± 4.1  |    | 0.99         | 0                  | 0                  |
| Cgo     | 16.2 ± 2.1  |    | 16.2 ± 2.1  |    | 15.4 ± 1.8  |    | 0.36         | 0                  | -5                 |
| Cgr     | 46.3 ± 4.3  | ab | 47.8 ± 3.7  | a  | 43.8 ± 5.8  | b  | <b>0.037</b> | 3                  | -5                 |
| Cme     | 45.4 ± 2.2  |    | 45.6 ± 2.8  |    | 45.4 ± 3.1  |    | 0.96         | 1                  | 0                  |
| Dto     | 43.3 ± 10.5 |    | 43.9 ± 10.3 |    | 41.0 ± 10.7 |    | 0.67         | 1                  | -5                 |
| Eex     | 33.2 ± 3.7  |    | 35.0 ± 3.8  |    | 35.0 ± 3.7  |    | 0.27         | 5                  | 5                  |
| Fsa     | 26.3 ± 4.5  |    | 27.1 ± 5.9  |    | 29.3 ± 6.4  |    | 0.28         | 3                  | 11                 |
| Fth     | 51.9 ± 12.2 | a  | 62.0 ± 10.7 | b  | 62.0 ± 10.7 | b  | <b>0.012</b> | 19                 | 19                 |
| Hma     | 53.3 ± 2.9  |    | 53.4 ± 2.9  |    | 52.1 ± 2.7  |    | 0.32         | 0                  | -2                 |
| Hmo     | 55.7 ± 4.0  |    | 55.4 ± 3.7  |    | 56.4 ± 2.9  |    | 0.70         | -1                 | 1                  |
| Mki     | 7.5 ± 0.8   |    | 7.4 ± 1.2   |    | 7.7 ± 0.8   |    | 0.60         | -1                 | 3                  |
| Mla     | 75.9 ± 5.3  |    | 76.5 ± 4.4  |    | 74.7 ± 4.4  |    | 0.50         | 1                  | -2                 |
| Mlu     | 22.6 ± 2.9  |    | 22.8 ± 2.1  |    | 22.7 ± 2.3  |    | 0.99         | 1                  | 0                  |
| Nbu     | 18.6 ± 3.3  |    | 18.9 ± 4.5  |    | 18.5 ± 3.6  |    | 0.95         | 2                  | 0                  |
| Paf     | 41.4 ± 4.5  |    | 38.1 ± 3.6  |    | 39.7 ± 3.9  |    | 0.057        | -8                 | -4                 |
| Pfu     | 29.6 ± 3.3  |    | 30.8 ± 3.0  |    | 29.9 ± 2.3  |    | 0.41         | 4                  | 1                  |
| Sgu     | 43.5 ± 3.7  |    | 42.3 ± 3.5  |    | 43.5 ± 4.3  |    | 0.57         | -3                 | 0                  |

**Table S4.** Classification of species into the successional groups (SG) early (ES) and late successional (LS) and the references supporting the classification. For most species, the classification was based on both how it was determined in the literature and observations of the abundance in forests with different degree of disturbances. The country where each study was conducted is given in brackets.

| Code | Scientific name                   | SG              | References for successional group                                                                                                                                                             |
|------|-----------------------------------|-----------------|-----------------------------------------------------------------------------------------------------------------------------------------------------------------------------------------------|
| Afa  | <i>Afrocarpus falcatus</i>        | LS              | Hundera et al., 2013a (Ethiopia); Tesfaye et al., 2010 (Ethiopia)                                                                                                                             |
| Agu  | <i>Albizia gummifera</i>          | LS              | Chapman & Chapman (Uganda); Eilu and Obua, 2005 (Uganda); Hundera et al., 2013a, b (Ethiopia); Mutiso et al., 2013 (Kenya)                                                                    |
| Bbr  | <i>Bridelia brideliifolia</i>     | ES              | Fisher & Killman, 2008 (Rwanda); African Plant Database, <a href="https://africanplantdatabase.ch/">https://africanplantdatabase.ch/</a>                                                      |
| Bmi  | <i>Bridelia micrantha</i>         | ES              | Eilu & Obua, 2005 (Uganda); Fashing et al., 2004 (Kenya); Mutiso et al., 2013 (Kenya)                                                                                                         |
| Cgo  | <i>Chrysophyllum gorungosanum</i> | LS              | Chapman & Chapman (Uganda); Fisher & Killman, 2008 (Rwanda); Eilu & Obua, 2005 (Uganda)                                                                                                       |
| Cgr  | <i>Carapa grandiflora</i>         | LS              | Fisher & Killman, 2008 (Rwanda); Momo et al., 2016 (Cameroon); Nyirambangutse et al., 2017 (Rwanda)                                                                                           |
| Cme  | <i>Croton megalocarpus</i>        | ES              | Mutiso et al., 2013 (Kenya); Fashing et al., 2004 (Kenya)                                                                                                                                     |
| Dto  | <i>Dombeya torrida</i>            | ES              | Eilu & Obua, 2005 (Uganda); Fisher & Killman, 2008 (Rwanda); Tesfaye et al., 2002 (Ethiopia)                                                                                                  |
| Eex  | <i>Entandrophragma excelsum</i>   | LS              | Fisher & Killman, 2008 (Rwanda); Hemp et al., 2017 (Tanzania)                                                                                                                                 |
| Fsa  | <i>Faurea saligna</i>             | LS              | Eilu & Obua 2005 (Uganda); Fisher & Killman, 2008 (Rwanda); Nyirambangutse et al., 2017 (Rwanda)                                                                                              |
| Fth  | <i>Ficus thonningii</i>           | LS <sup>1</sup> | Hundera et al., 2013b (Ethiopia); Kirika et al., 2008 (Kenya)                                                                                                                                 |
| Hma  | <i>Harungana madagascariensis</i> | ES              | Mutiso et al., 2013 (Kenya); Fashing et al., 2004 (Kenya)                                                                                                                                     |
| Hmo  | <i>Harungana montana</i>          | ES              | Fisher & Killman, 2008 (Rwanda); Nyirambangutse et al., 2017 (Rwanda)                                                                                                                         |
| Mki  | <i>Macaranga kilimandscharica</i> | ES              | Eilu & Obua, 2005 (Uganda); Hundera et al., 2013b (Ethiopia); Nyirambangutse et al., 2017 (Rwanda); Ssali et al., 2019, Rutten et al., 2015 (Tanzania)                                        |
| Mla  | <i>Maesa lanceolata</i>           | ES              | Eilu & Obua 2005 (Uganda); Fashing et al., 2004 (Kenya); Hundera et al., 2013b (Ethiopia); Momo et al., 2016 (Cameroon); Mutiso et al., 2013 (Kenya); Rutten et al., 2015 (Tanzania)          |
| Mlu  | <i>Markhamia lutea</i>            | ES <sup>2</sup> | Chapman & Chapman (Uganda); Mutiso et al 2013; Fashing et al., 2004 (Kenya)                                                                                                                   |
| Nbu  | <i>Newtonia buchananii</i>        | LS              | Chapman & Chapman (Uganda); Eilu & Obua, 2005 (Uganda); Fisher & Killman, 2008 (Rwanda)                                                                                                       |
| Paf  | <i>Prunus africana</i>            | LS              | Hundera et al., 2013a, b (Ethiopia); Tesfaye et al., 2010 (Ethiopia)                                                                                                                          |
| Pfu  | <i>Polyscias fulva</i>            | ES              | Eilu & Obua, 2005 (Uganda); Fashing et al. 2004 (Kenya); Hundera et al., 2013b (Ethiopia); Mutiso et al., 2013 (Kenya); Nyirambangutse et al., 2017 (Rwanda); Tesfaye et al., 2010 (Ethiopia) |
| Sgu  | <i>Syzygium guineense</i>         | LS              | Hundera et al., 2013a, b (Ethiopia); Nyirambangutse et al., 2017 (Rwanda); Rutten et al., 2015 (Tanzania); Tesfaye et al., 2010 (Ethiopia); Ssali et al., 2019 (Uganda)                       |

<sup>1</sup>Also defined as ES (Hundera et al., 2013b), but here considered as LS species as it mainly occurs in non-disturbed areas, but as a potential epiphyte and strangler the successional strategy is special.

<sup>2</sup>Mentioned as a possible LS species in Mutiso et al. (2013) and both in disturbed and non-disturbed forests (Chapman & Chapman, 1995) but it has mostly been defined as an ES species.

#### References to Table S4.

- Chapman, C.A. & Chapman, L.J. (1997) Forest regeneration in logged and unlogged forests of Kibale National Park, Uganda. *Biotropica*, 29, 396-412. <https://doi.org/10.1111/j.1744-7429.1997.tb00035.x>
- Eilu, G. & Obua, J. (2005) Tree condition and natural regeneration in disturbed sites of Bwindi Impenetrable Forest National Park, southwestern Uganda. *Tropical Ecology*, 46, 99-111.
- Fashing, P.J., Forrestel, A., Scully, C. & Cords, M. (2004) Long-term tree population dynamics and their implications for the conservation of the Kakamega Forest, Kenya. *Biodiversity and Conservation* 13, 753–771. <https://doi.org/10.1023/B:BIOC.0000011724.34275.73>
- Fischer E. & Killman D. (2008) Illustrated Field Guide to the Plants of Nyungwe National Park Rwanda. *Koblenz Geographical Colloquia, Series Biogeographical Monographs 1*, 771p.
- Hemp, A., Zimmermann, R., Remmele, S., Pommer, U., Berauer, B., Hemp, C. & Fischer, M. (2017) Africa's highest mountain harbours Africa's tallest trees. *Biodiversity Conservation*, 26, 103–113. <https://doi.org/10.1007/s10531-016-1226-3>
- Hundera, K., Aerts, R., Fontaine, A., Van Mechelen, M., Gijbels, P., Honnay, O. & Muys, B. (2013a) Effects of coffee management intensity on composition, structure, and regeneration status of Ethiopian moist evergreen Afromontane forests. *Environmental Management*, 51, 801–809. <https://doi.org/10.1007/s00267-012-9976-5>
- Hundera, K., Honnay, O., Aerts, R. & Muys, B. (2013b) The potential of small exclosures in assisting regeneration of coffee shade trees in South-Western Ethiopian coffee forests. *African Journal of Ecology*, 53, 389–397. <https://doi.org/10.1111/aje.12203>
- Kirika, J.M. Bleher, B., Bohning-Gaese, K., Chira, R. & Farwig, N. (2008) Fragmentation and local disturbance of forests reduce frugivore diversity and fruit removal in *Ficus thonningii* trees. *Basic Applied Ecology*, 9, 663-672. <https://doi.org/10.1016/j.baae.2007.07.002>
- Momo, S.M.C., Temgoua, L.F., Nguenguim, J.R. & Nkongmeneck, B-A. (2016) Comparison of plant communities between primary and secondary tropical forests of Mount Oku, Cameroon. *Journal of Ecology and The Natural Environment*, F63DB9364239. <https://doi.org/10.5897/JENE2016.0598>
- Mutiso, F.M., Hitimana, J., Kiyiapi, J.L., Sang, F.K. & Eboh, E. (2013) Recovery of Kakamega tropical rainforest from anthropogenic disturbances. *Journal of Tropical Forest Science* 25, 566–576. <https://www.jstor.org/stable/23616998>
- Nyirambangutse, B., Zibera, E., Uwizeye, F. K., Nsabimana, D., Bizuru, E., Pleijel, H., Uddling, J. & Wallin, G. (2017). Carbon stocks and dynamics at different successional stages in an Afromontane tropical forest. *Biogeosciences*, 14, 1285–1303. <https://doi.org/10.5194/bg-14-1285-2017>
- Rutten, G., Ensslin, R., Hemp, A. & Fischer, M. (2015) Forest structure and composition of previously selectively logged and non-logged montane forests at Mt. Kilimanjaro. *Forest Ecology and Management* 337, 61–66. <http://dx.doi.org/10.1016/j.foreco.2014.10.036>
- Ssali, F., Moe, S.R., Sheil, D. (2019) The differential effects of bracken (*Pteridium aquilinum* (L.) Kuhn) on germination and seedling performance of tree species in the African tropics. *Plant Ecology*, 220, 41-55, <https://doi.org/10.1007/s11258-018-0901-8>
- Tesfaye, G., Teketay, D. & Fetene, M. (2002) Regeneration of fourteen tree species in Harena forest, southeastern Ethiopia. *Flora*, 197, 461–474. <https://doi.org/10.1078/0367-2530-1210063>
- Tesfaye, G., Teketay, D., Fetene, M. & Beck, E. (2010) Regeneration of seven indigenous tree species in a dry Afromontane forest, southern Ethiopia. *Flora*, 205, 135-143. <https://doi.org/10.1016/j.flora.2008.12.006>

**Table S5.** P-values and total degrees of freedom (df Tot) of one-way ANOVA for species-specific site effects on tree diameter at base ( $D_{base}$ ), tree height (H), standardised relative growth rates (RGR) of  $D_{base}$  at a  $D_{base}$  of 10-25 mm (D-RGR $_{D10-25}$ ) and 50-75 mm (D-RGR $_{D50-75}$ ), of height at a height of 75-100 cm (H-RGR $_{H75-100}$ ) and 250-300 cm (H-RGR $_{H250-300}$ ), number of stems per individual (stems#), and tree mortality. Df for site was always 2. The analysis was based on plot averages of each species (maximum 18 plots, 20 species and 3 sites). Species that did not meet the criterion for sufficient number of plot replicates (i.e. at least one individual on  $\geq 12$  plots per site) were not included in the analysis, indicated by NA (not applicable) in the table. ND, no dead individuals and thus no variance analysis could be conducted.

| Species | $D_{base}$ |        | Height  |        | D-RGR $_{D10-25}$ |        | D-RGR $_{D50-75}$ |        | H-RGR $_{H75-100}$ |        | H-RGR $_{H250-300}$ |        | Stems#  |        | Mortality |        |
|---------|------------|--------|---------|--------|-------------------|--------|-------------------|--------|--------------------|--------|---------------------|--------|---------|--------|-----------|--------|
|         | P-value    | df Tot | P-value | df Tot | P-value           | df Tot | P-value           | df Tot | P-value            | df Tot | P-value             | df Tot | P-value | df Tot | P-value   | df Tot |
| Bbr     | <0.001     | 54     | <0.001  | 54     | <0.001            | 54     | 0.001             | 54     | <0.001             | 53     | <0.001              | 54     | 0.26    | 54     | ND        | 54     |
| Hmo     | <0.001     | 54     | <0.001  | 54     | <0.001            | 54     | <0.001            | 54     | <0.001             | 54     | 0.68                | 54     | 0.50    | 54     | 0.36      | 54     |
| Mki     | <0.001     | 54     | 0.008   | 54     | 0.090             | 54     | 0.064             | 51     | 0.17               | 47     | 0.35                | 53     | 0.32    | 54     | <0.001    | 54     |
| Mla     | <0.001     | 54     | 0.22    | 54     | <0.001            | 54     | <0.001            | 52     | 0.94               | 54     | 0.70                | 54     | 0.004   | 54     | 0.057     | 54     |
| Pfu     | 0.001      | 54     | <0.001  | 54     | 0.011             | 54     | 0.018             | 54     | <0.001             | 54     | 0.003               | 53     | 0.32    | 54     | 0.13      | 54     |
| Agu     | <0.001     | 54     | <0.001  | 54     | 0.20              | 50     | NA                | 12     | NA                 | 40     | NA                  | 24     | 0.93    | 54     | <0.001    | 54     |
| Bmi     | <0.001     | 54     | <0.001  | 54     | <0.001            | 54     | 0.095             | 53     | <0.001             | 53     | 0.033               | 54     | 0.009   | 54     | 0.172     | 54     |
| Cme     | <0.001     | 54     | <0.001  | 54     | <0.001            | 54     | <0.001            | 54     | <0.001             | 54     | <0.001              | 54     | 0.25    | 54     | 0.012     | 54     |
| Dto     | <0.001     | 54     | <0.001  | 54     | <0.001            | 54     | 0.024             | 53     | <0.001             | 53     | 0.002               | 54     | <0.001  | 54     | ND        | 54     |
| Hma     | <0.001     | 54     | <0.001  | 54     | <0.001            | 54     | 0.005             | 54     | <0.001             | 54     | 0.54                | 54     | 0.89    | 54     | 0.35      | 54     |
| Mlu     | <0.001     | 54     | <0.001  | 54     | <0.001            | 54     | NA                | 43     | <0.001             | 44     | 0.003               | 47     | 0.004   | 54     | ND        | 54     |
| Afa     | <0.001     | 54     | <0.001  | 54     | 0.14              | 54     | 0.49              | 46     | 0.23               | 54     | 0.008               | 54     | 0.45    | 54     | 0.157     | 54     |
| Cgr     | <0.001     | 51     | <0.001  | 51     | <0.001            | 50     | NA                | 9      | NA                 | 45     | NA                  | 12     | 0.33    | 54     | <0.001    | 51     |
| Fsa     | <0.001     | 54     | <0.001  | 54     | <0.001            | 54     | 0.029             | 43     | <0.001             | 54     | NA                  | 43     | 0.010   | 54     | <0.001    | 54     |
| Paf     | <0.001     | 54     | <0.001  | 54     | <0.001            | 54     | NA                | 32     | <0.001             | 53     | NA                  | 39     | 0.002   | 54     | 0.013     | 54     |
| Sgu     | 0.012      | 54     | 0.084   | 54     | 0.32              | 54     | 0.014             | 50     | 0.16               | 54     | 0.19                | 54     | 0.035   | 54     | 0.58      | 54     |
| Cgo     | 0.001      | 54     | 0.003   | 54     | <0.001            | 49     | NA                | 0      | NA                 | 38     | NA                  | 2      | 0.71    | 54     | <0.001    | 54     |
| Eex     | 0.001      | 54     | 0.11    | 54     | 0.006             | 54     | NA                | 24     | 0.13               | 41     | NA                  | 0      | 0.19    | 54     | <0.001    | 54     |
| Fth     | <0.001     | 54     | <0.001  | 54     | 0.002             | 54     | <0.001            | 52     | 0.50               | 52     | <0.001              | 53     | 0.001   | 54     | 0.81      | 54     |
| Nbu     | 0.002      | 54     | 0.15    | 54     | NA                | 41     | NA                | 1      | 0.088              | 44     | NA                  | 15     | 1.00    | 54     | <0.001    | 54     |



**Table S6.** Number of individuals recorded dead at each tri-monthly census of each species and site. The graded colour scale from light red to bright red indicate an increasing number of dead individuals. Newly dead trees recorded at each census in percent of remaining trees are presented graphically below the table. Grey marked dates in the table head indicate first census after the annual dry period. However, all trees were irrigated during the entire dry period in 2018, but not in 2019. During the first census after planting (Mar-18) only six trees were recorded dead, but five of them were replaced by new individuals from the nursery and was not included in the mortality data. #, number of dead trees. Full species names are given in Table 2.

| Species | High elevation (Sigira) |        |        |        |        |        |        |        | Mid elevation (Rubona) |        |        |        |        |        |        |        | Low elevation (Makera) |        |        |        |        |        |        |        | Species |     |     |     |     |    |                      |
|---------|-------------------------|--------|--------|--------|--------|--------|--------|--------|------------------------|--------|--------|--------|--------|--------|--------|--------|------------------------|--------|--------|--------|--------|--------|--------|--------|---------|-----|-----|-----|-----|----|----------------------|
|         | Dec-17                  | Mar-18 | Jul-18 | Oct-18 | Feb-19 | Jun-19 | Sep-19 | Dec-19 | Dec-17                 | Mar-18 | Jul-18 | Oct-18 | Feb-19 | Jun-19 | Sep-19 | Dec-19 | Dec-17                 | Mar-18 | Jul-18 | Oct-18 | Feb-19 | Jun-19 | Sep-19 | Dec-19 |         |     |     |     |     |    |                      |
|         | 1                       | 2      | 3      | 4      | 5      | 6      | 7      | 8      | 1                      | 2      | 3      | 4      | 5      | 6      | 7      | 8      | 1                      | 2      | 3      | 4      | 5      | 6      | 7      | 8      |         |     |     |     |     |    |                      |
| Afa     |                         |        |        |        |        |        |        | 0      | 0                      |        |        |        | 1      | 1      | 1      | 3      | 3.3                    |        |        |        | 1      |        |        |        | 1       | 1   | Afa |     |     |    |                      |
| Agu     |                         |        |        | 1      |        | 1      | 4      | 5      | 11                     | 12     |        |        |        | 2      | 2      | 2      | 10                     | 11     |        |        | 11     | 13     | 2      | 1      | 1       | 28  | 31  | Agu |     |    |                      |
| Bbr     |                         |        |        |        |        |        |        | 0      | 0                      |        |        |        |        |        |        | 0      | 0                      |        |        |        |        |        |        |        |         | 0   | 0   | Bbr |     |    |                      |
| Bmi     |                         |        |        |        |        |        |        | 0      | 0                      |        |        |        | 1      | 2      |        | 3      | 3.3                    |        |        |        |        |        |        |        |         | 0   | 0   | Bmi |     |    |                      |
| Cgo     |                         |        |        |        |        |        |        | 1      | 1                      |        |        | 2      | 4      | 2      | 5      | 3      | 20                     | 22     |        |        | 13     | 20     | 11     | 4      | 3       | 51  | 57  | Cgo |     |    |                      |
| Cgr     |                         |        |        | 1      |        |        |        | 1      | 1.1                    |        |        | 1      | 1      | 6      | 2      | 14     | 16                     |        |        | 14     | 16     | 19     | 11     | 3      | 63      | 70  | Cgr |     |     |    |                      |
| Cme     |                         |        |        |        |        |        |        | 0      | 0                      |        |        |        |        |        |        | 0      | 0                      |        |        |        | 1      | 1      | 2      |        | 4       | 4   | Cme |     |     |    |                      |
| Dto     |                         |        |        |        |        |        |        | 0      | 0                      |        |        |        |        |        |        | 0      | 0                      |        |        |        |        |        |        |        | 0       | 0   | Dto |     |     |    |                      |
| Eex     |                         |        |        |        |        |        |        | 0      | 0                      |        |        | 1      | 1      | 2      | 1      | 6      | 6.7                    |        |        |        | 1      | 1      | 4      | 2      | 1       | 23  | 26  | Eex |     |    |                      |
| Fsa     |                         |        |        |        |        |        |        | 1      | 1.1                    |        |        | 1      | 1      | 2      | 1      | 1      | 1.1                    |        |        | 1      | 1      | 4      | 2      | 1      | 2       | 21  | 23  | Fsa |     |    |                      |
| Fth     |                         |        |        |        |        |        |        | 2      | 2.2                    |        |        |        |        |        | 2      | 2      | 2.2                    |        |        |        |        |        | 1      |        | 1       | 1   | Fth |     |     |    |                      |
| Hma     |                         |        |        |        |        |        |        | 1      | 1.1                    |        |        |        |        |        |        | 0      | 0                      |        |        |        |        |        | 1      |        | 1       | 2   | 2   | Hma |     |    |                      |
| Hmo     |                         |        |        |        |        |        |        | 2      | 2.2                    |        |        |        |        |        |        | 0      | 0                      |        |        |        |        |        | 1      |        | 1       | 1   | 1   | Hmo |     |    |                      |
| Mki     |                         |        |        |        |        |        |        | 1      | 1.1                    |        |        | 2      |        |        |        | 4      | 4.4                    |        |        |        | 11     | 4      | 3      | 1      | 34      | 38  | Mki |     |     |    |                      |
| Mla     |                         |        |        |        |        |        |        | 1      | 1.1                    |        |        |        |        |        |        | 0      | 0                      |        |        |        |        |        |        | 4      | 1       | 5   | 6   | Mla |     |    |                      |
| Mpl     |                         |        |        |        |        |        |        | 0      | 0                      |        |        |        |        |        |        | 0      | 0                      |        |        |        |        |        |        |        | 0       | 0   | Mpl |     |     |    |                      |
| Nbu     |                         |        |        |        |        |        |        | 4      | 4.4                    |        |        | 2      | 6      | 10     | 2      | 25     | 28                     |        |        |        | 21     | 18     | 3      | 3      | 57      | 63  | Nbu |     |     |    |                      |
| Paf     |                         |        |        |        |        |        |        | 1      | 1.1                    |        |        | 1      | 7      |        | 1      | 9      | 10                     |        |        |        |        |        |        |        | 0       | 0   | Paf |     |     |    |                      |
| Pfu     |                         |        |        |        |        |        |        | 0      | 0                      |        |        |        |        |        |        | 0      | 0                      |        |        |        | 1      |        | 1      |        | 2       | 2   | Pfu |     |     |    |                      |
| Sgu     |                         |        |        |        |        |        |        | 1      | 1.1                    |        |        |        | 1      | 1      | 1      | 2      | 2.2                    |        |        |        | 1      | 1      |        | 1      | 3       | 3   | Sgu |     |     |    |                      |
| #       | 0                       | 0      | 0      | 6      | 7      | 12     | 12     | 17     | 54                     | 3      | 0      | 0      | 9      | 15     | 33     | 12     | 19                     | 11     | 99     | 6      | 0      | 1      | 16     | 84     | 84      | 59  | 35  | 17  | 296 | 18 | #                    |
| %       | 0                       | 0      | 0      | 11     | 13     | 22     | 22     | 31     |                        |        | 0      | 0      | 9      | 15     | 33     | 12     | 19                     | 11     |        |        | 0      | 0      | 5      | 28     | 28      | 20  | 12  | 6   |     |    | % of all dead trees  |
| %       | 0.0                     | 0.0    | 0.0    | 0.3    | 0.4    | 0.7    | 0.7    | 1.0    |                        |        | 0.0    | 0.0    | 0.5    | 0.8    | 1.9    | 0.7    | 1.1                    | 0.6    |        |        | 0.0    | 0.0    | 0.9    | 4.7    | 4.9     | 3.7 | 2.2 | 1.1 |     |    | % of remaining trees |

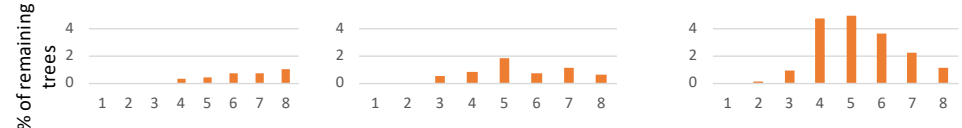

# Rwanda TREE project

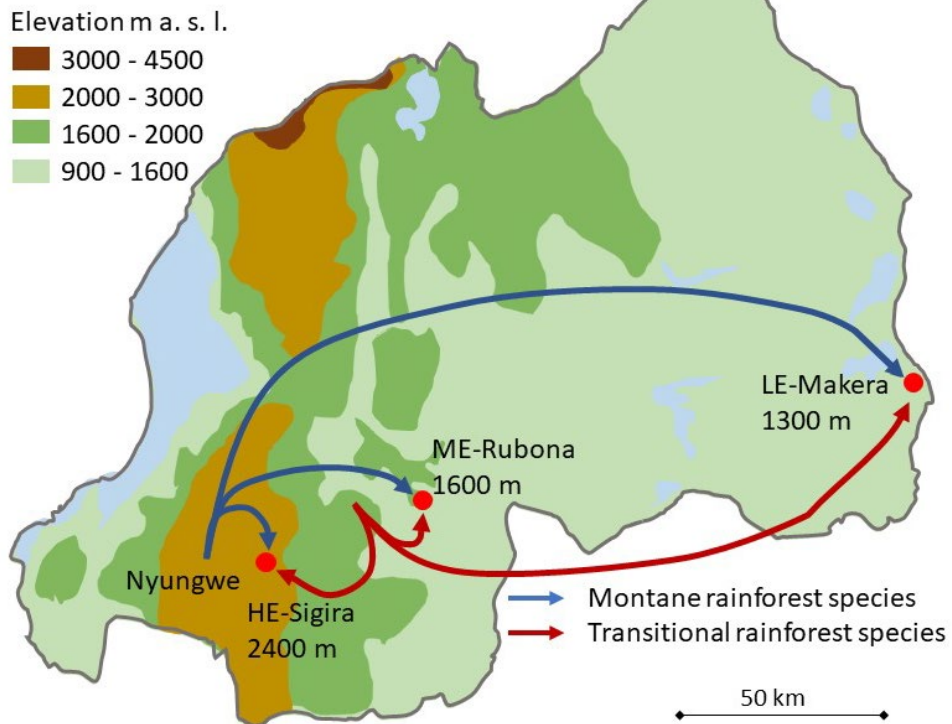

**Figure S1.** Schematic topographic map of Rwanda with the three sites of the TRopical Elevation Experiment in Rwanda (Rwanda TREE; [www.rwandatree.com](http://www.rwandatree.com)) using native tropical species from montane rainforest and Lake Victoria transitional rainforests. Nyungwe (1600-2950 m a.s.l) is a national park in south-west Rwanda dominated by montane rainforest species, but also include transitional rainforest species at lower elevations. HE, high elevation site; ME, mid elevation site; LE, low elevation site.

## Sigira plot

Plot shape: 102.5 x 52 m,  
 Position S 2° 30' 54" E 29° 23' 44",  
 Elevation 2390-2400, max 15 m altitude  
 difference within plot,

Treatment legend

|   |       |                            |
|---|-------|----------------------------|
| 1 | LW/LN | Low Water/Low Nutrient     |
| 2 | MW/LN | Medium Water/Low Nutrient  |
| 3 | HW/LN | High Water/Low Nutrient    |
| 4 | LW/HN | Low Water/High Nutrient    |
| 5 | MW/HN | Medium Water/High Nutrient |
| 6 | HW/HN | High Water/High Nutrient   |

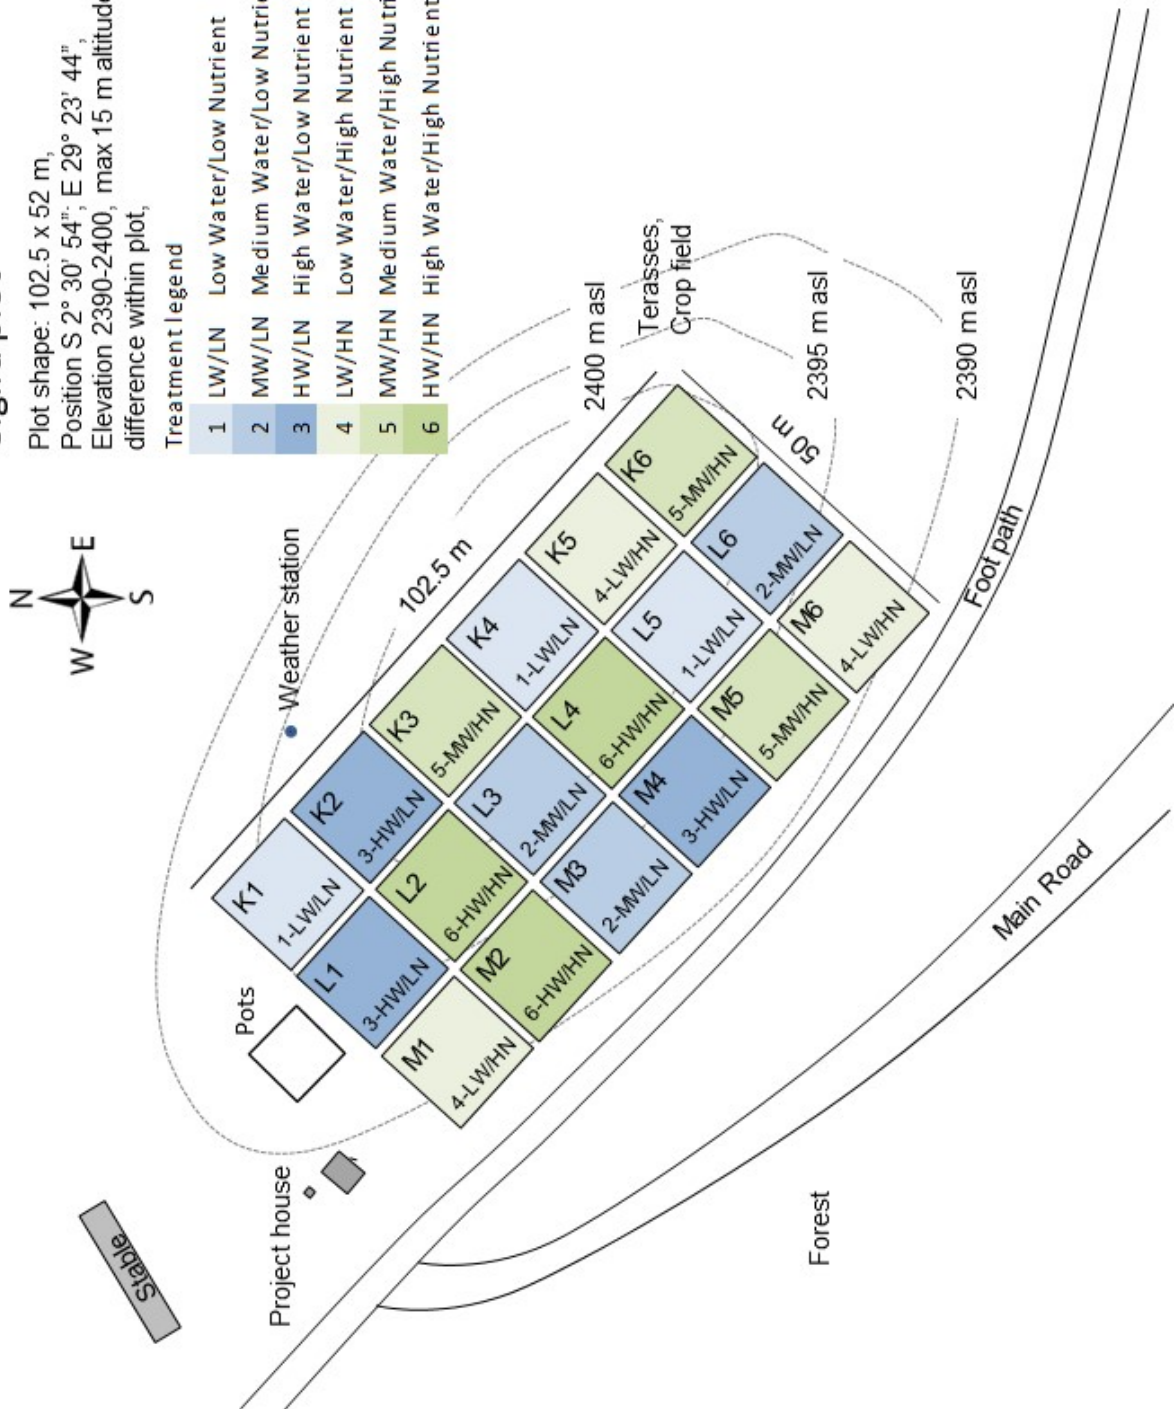

**Figure S2.** Site map and experimental design at the high elevation site (Sigira). Water and nutrient treatments started late in 2019 and had no effect on the results in this study.

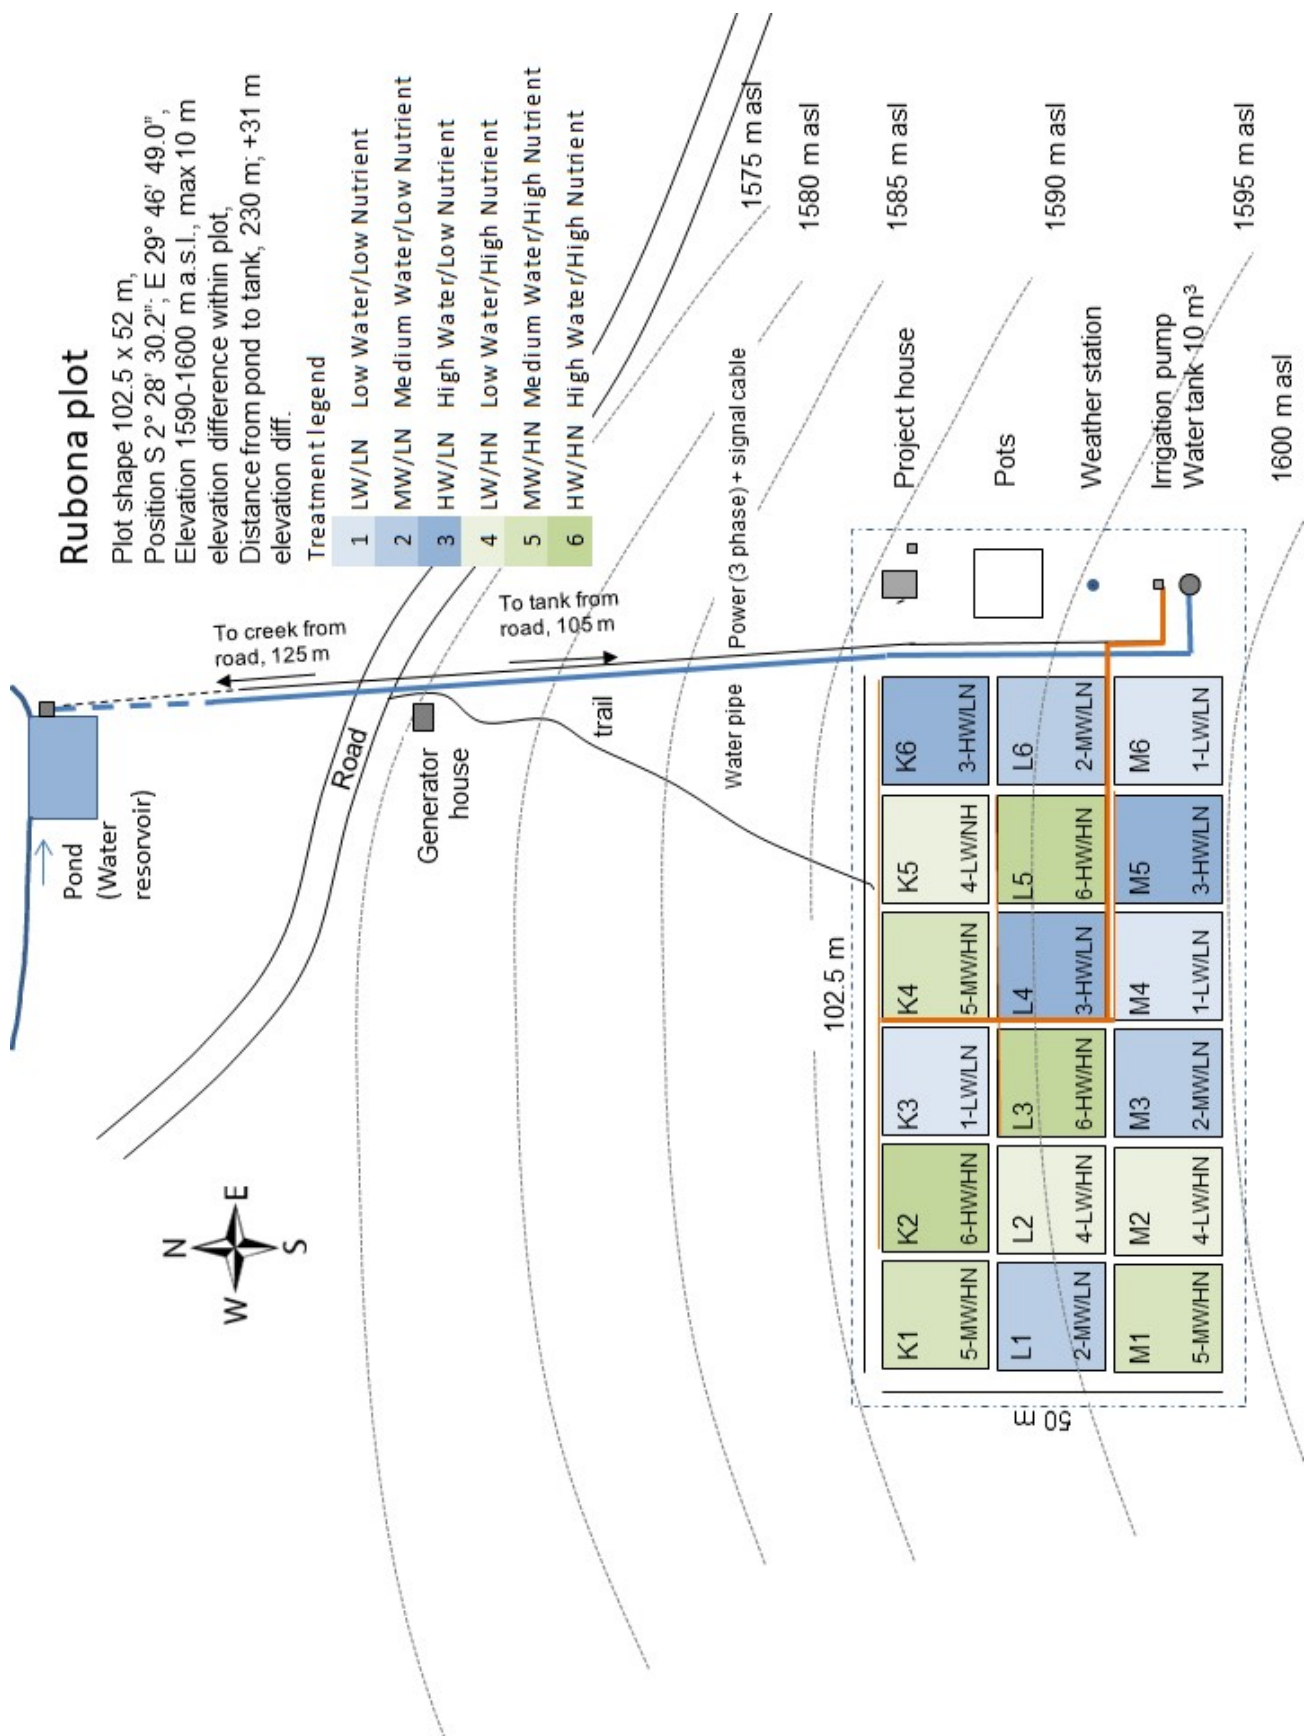

**Figure S3.** Site map and experimental design at the mid elevation site (Rubona). Water and nutrient treatments started late in 2019 and had no effect on the results in this study.

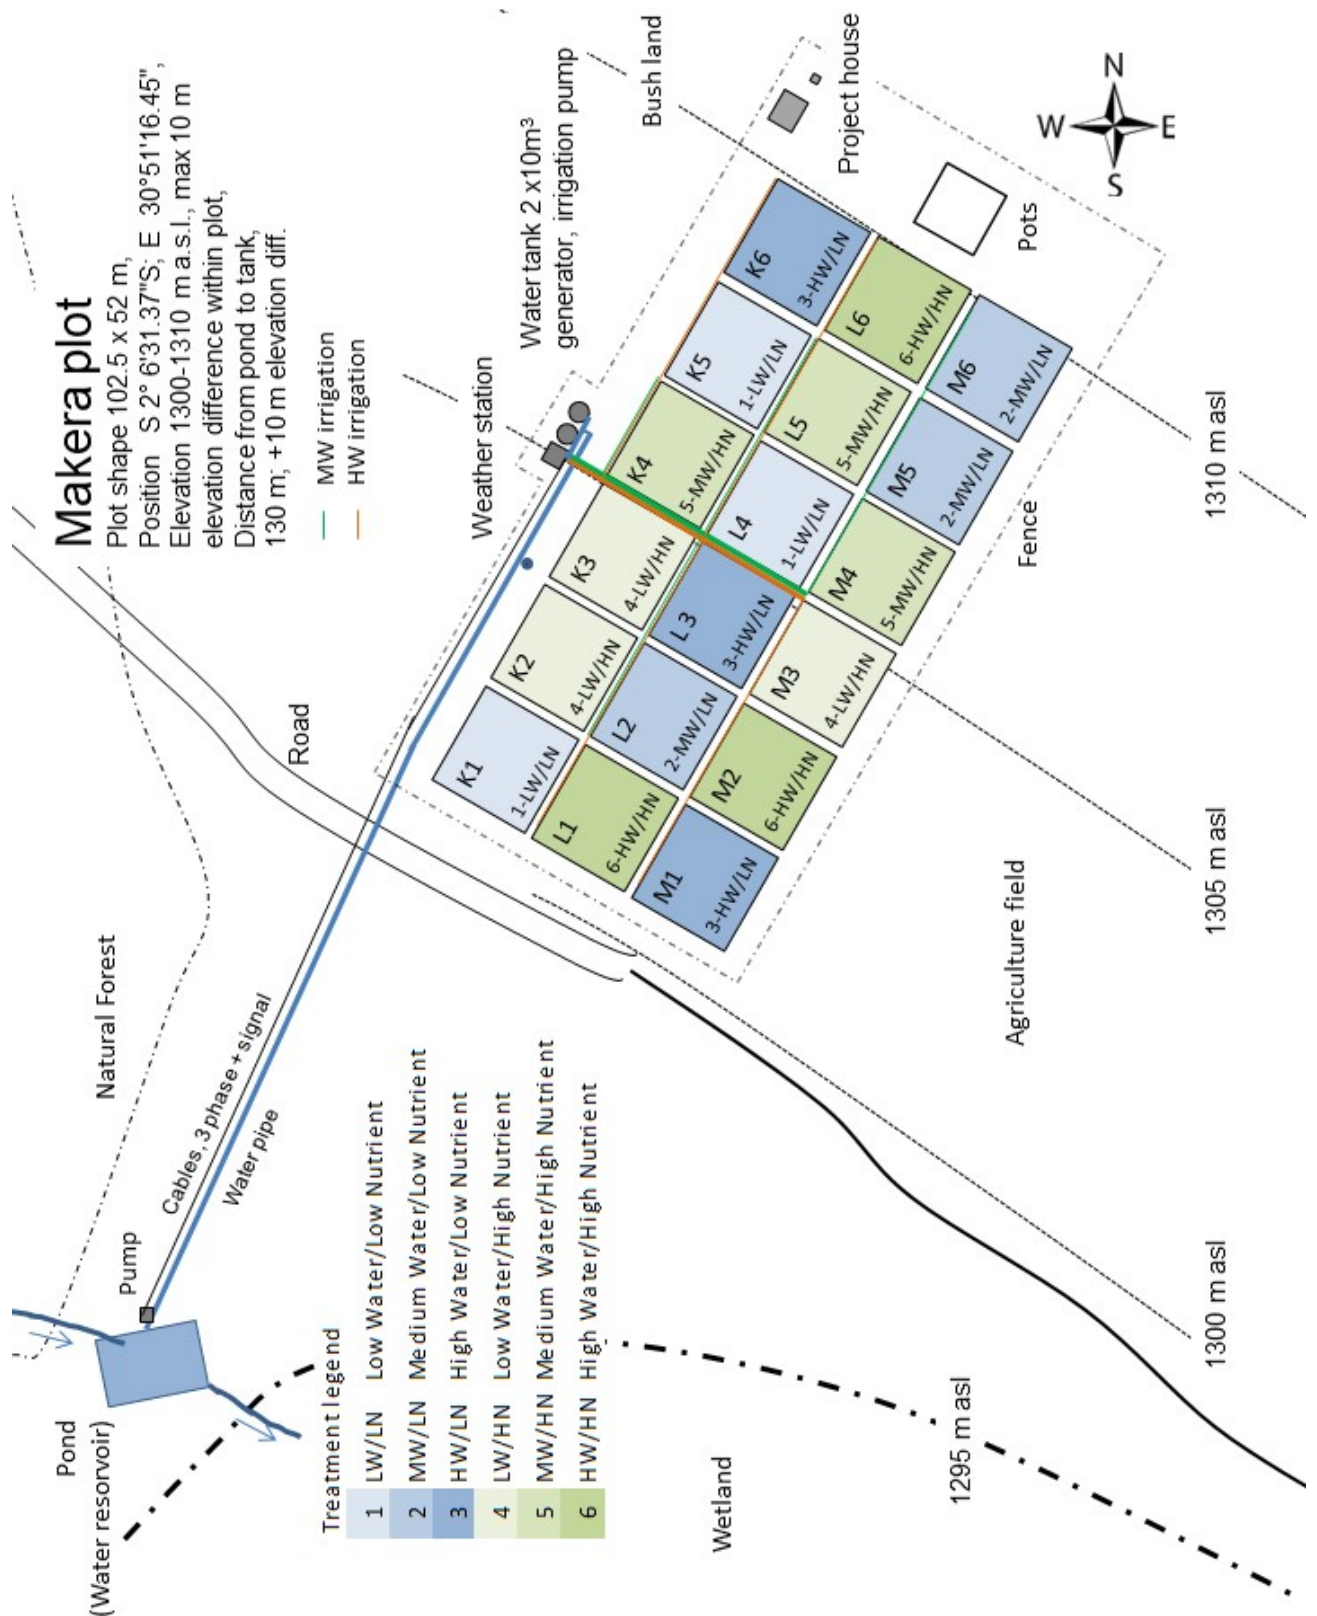

**Figure S4.** Site map and experimental design at the low elevation site (Makera). Water and nutrient treatments started late in 2019 and had no effect on the results in this study.

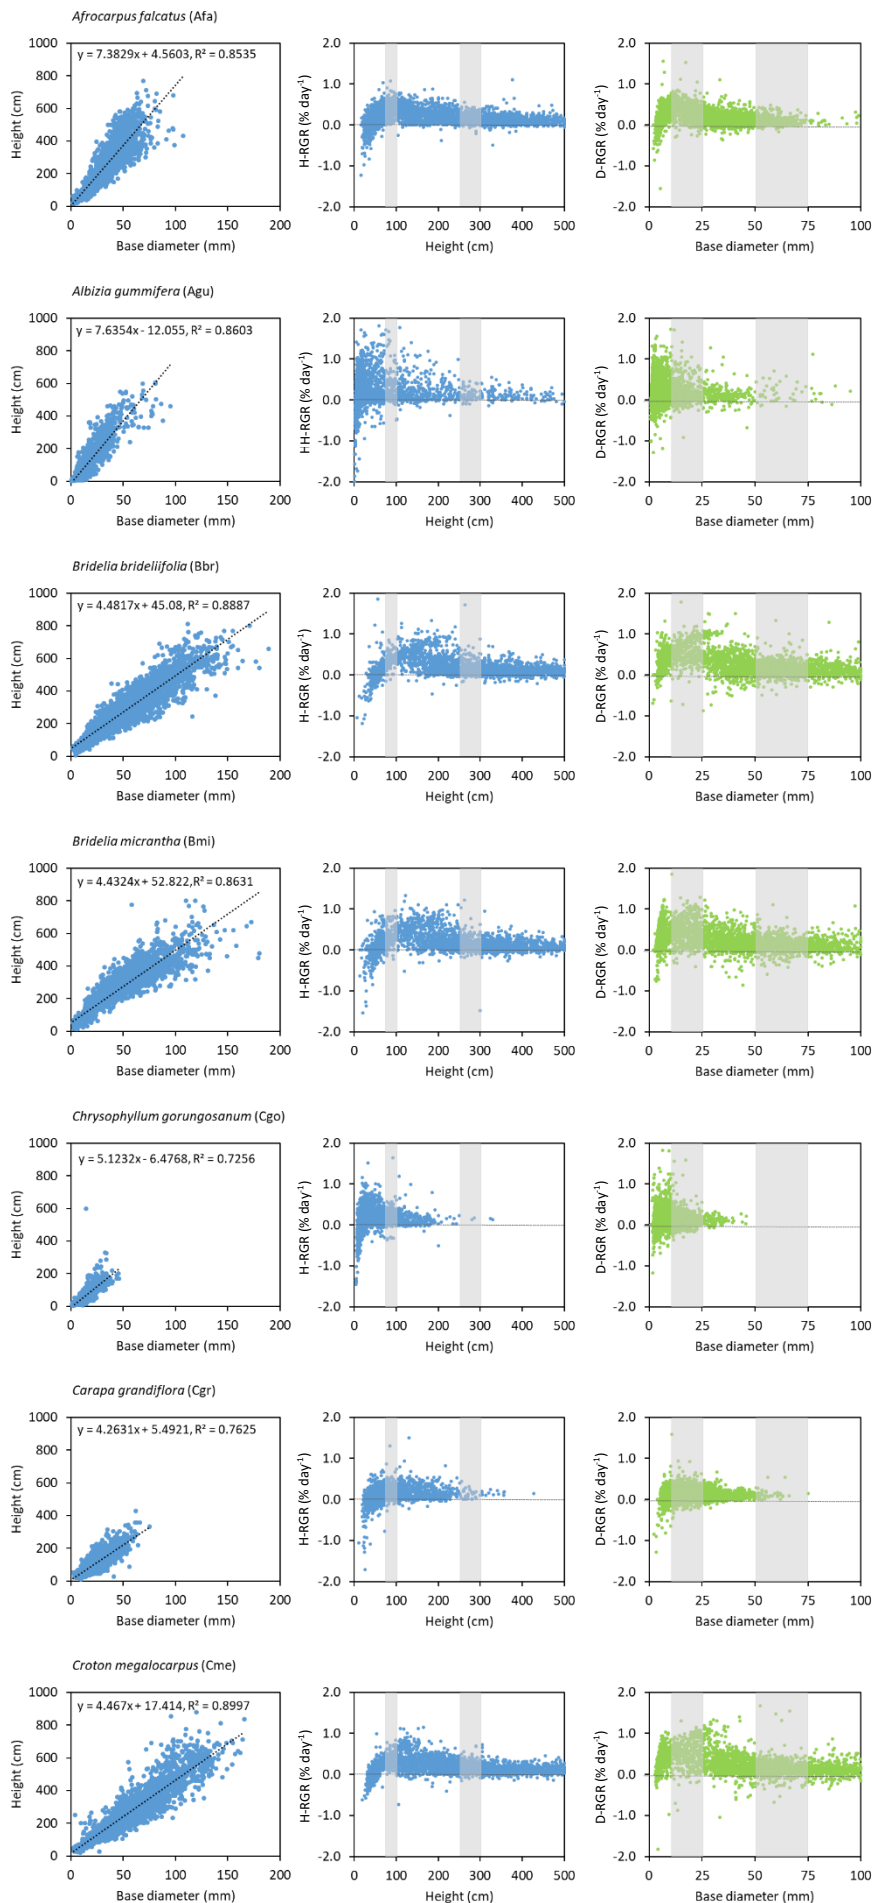

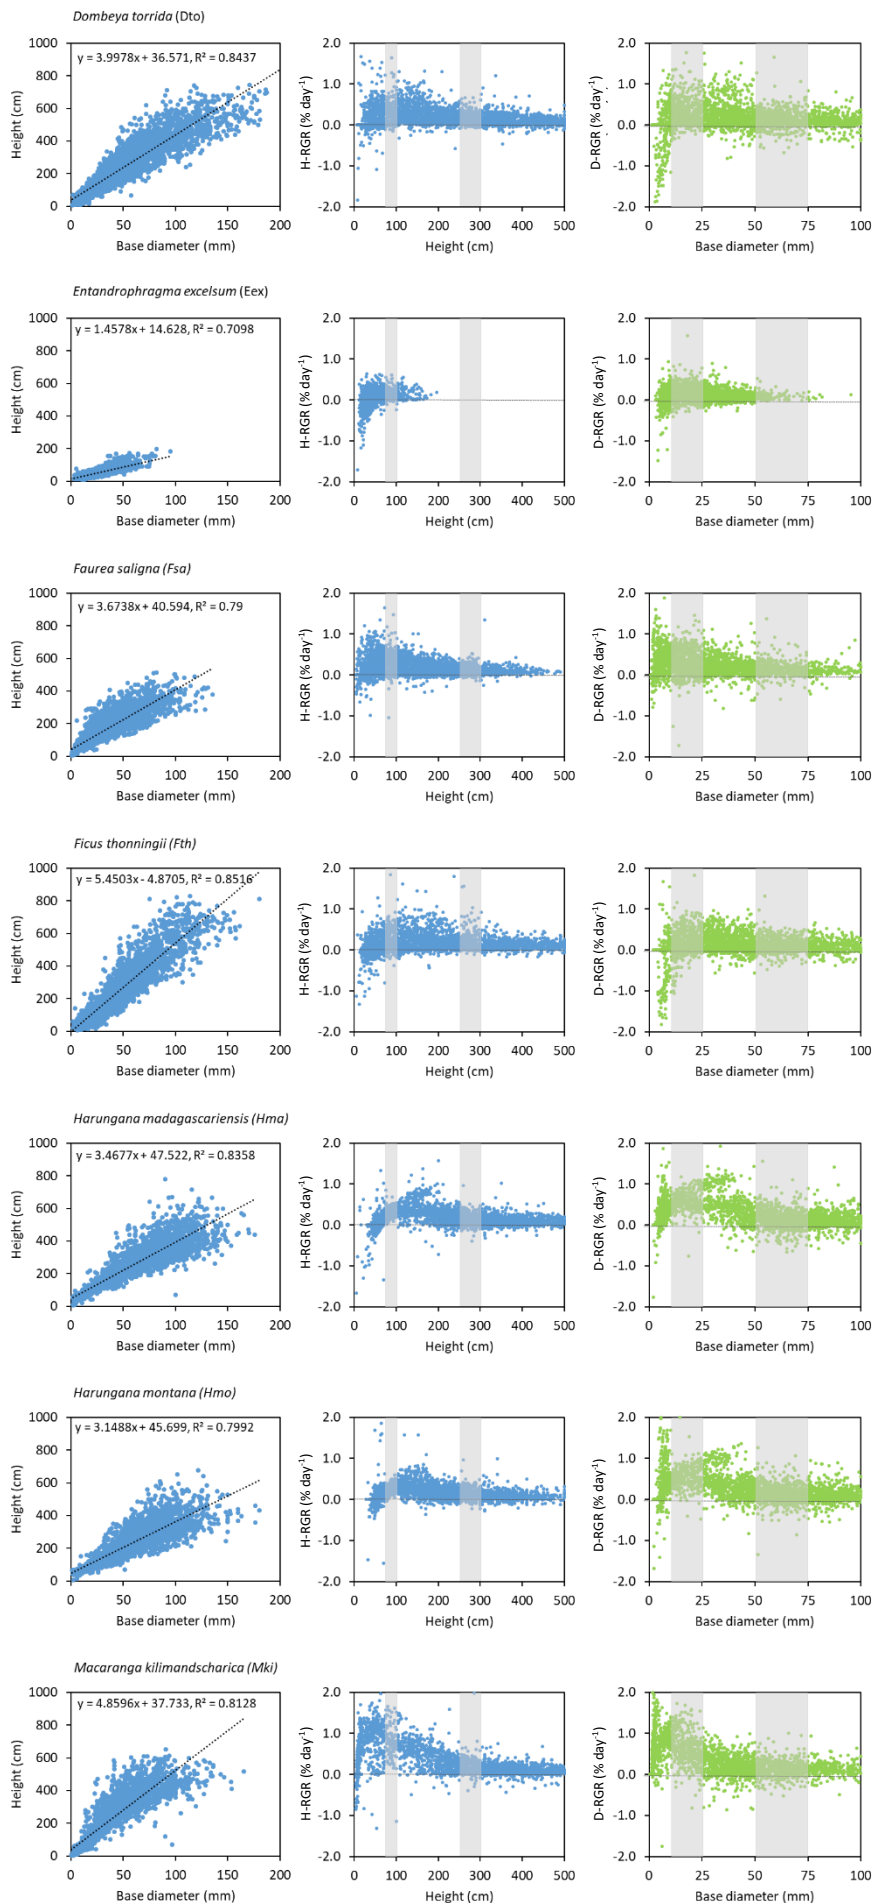

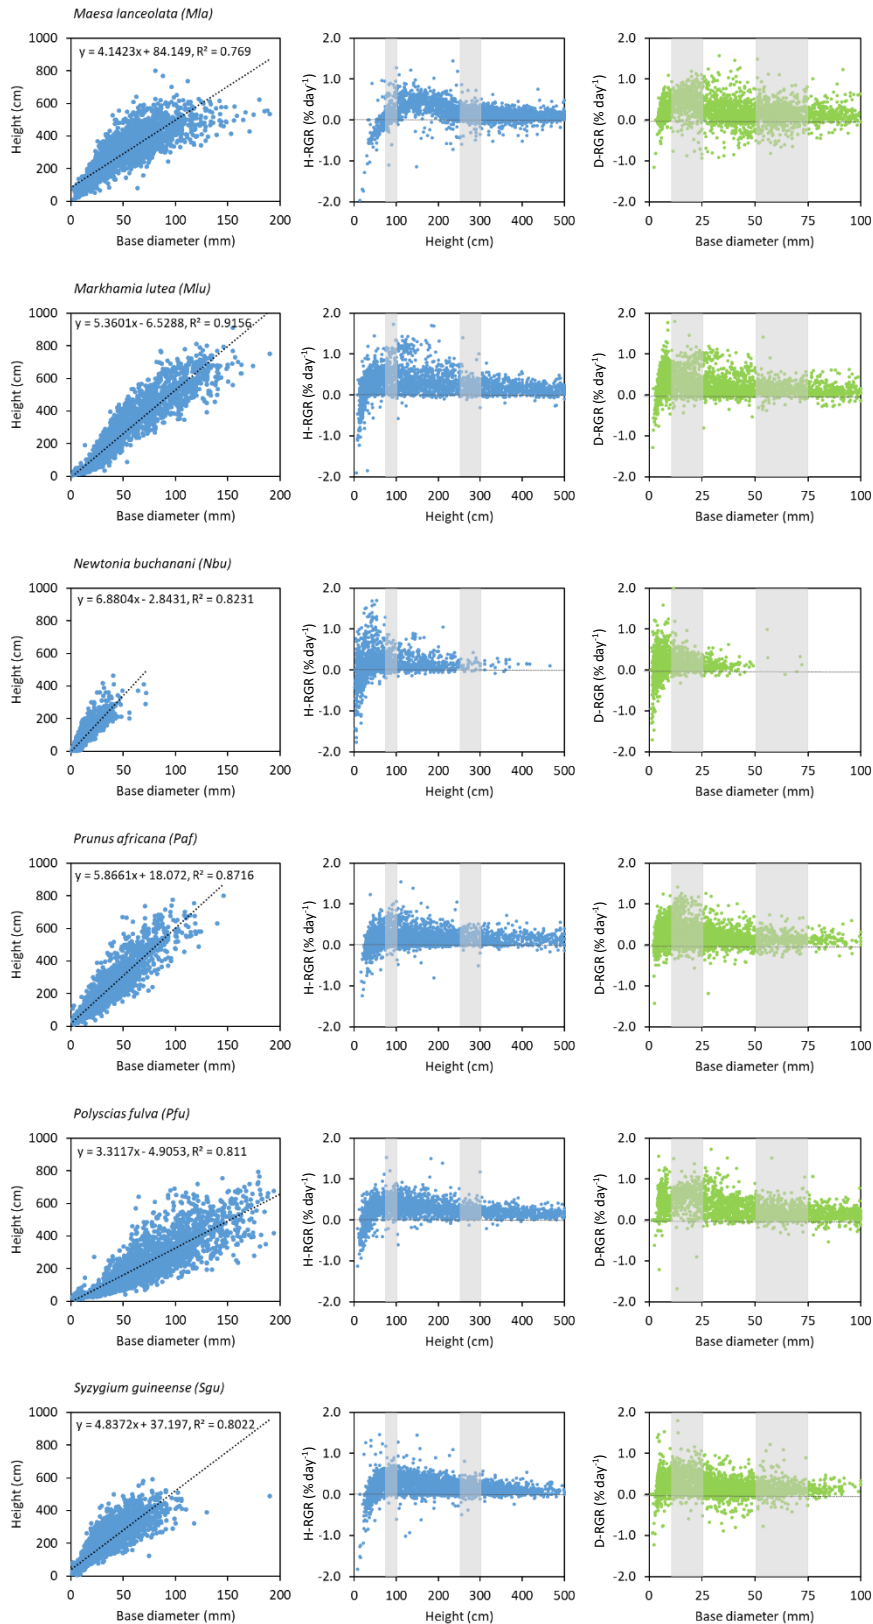

**Figure S5.** The relation between height and base diameter and the relative growth rate (RGR) for height (H-RGR) and base diameter (D-RGR) in relation to height and base diameter, respectively, for all 20 species measured tri-monthly over two years at all three sites. The grey marked height and base diameter intervals are used to calculate the standardised H-RGR and D-RGR, respectively. Negative height RGR of small trees are mainly due to soil erosion effects between the census while negative height and diameter RGR on larger trees mainly are due to broken stems causing shorter trees and/or for multistem trees changes of stem used for the measurements.



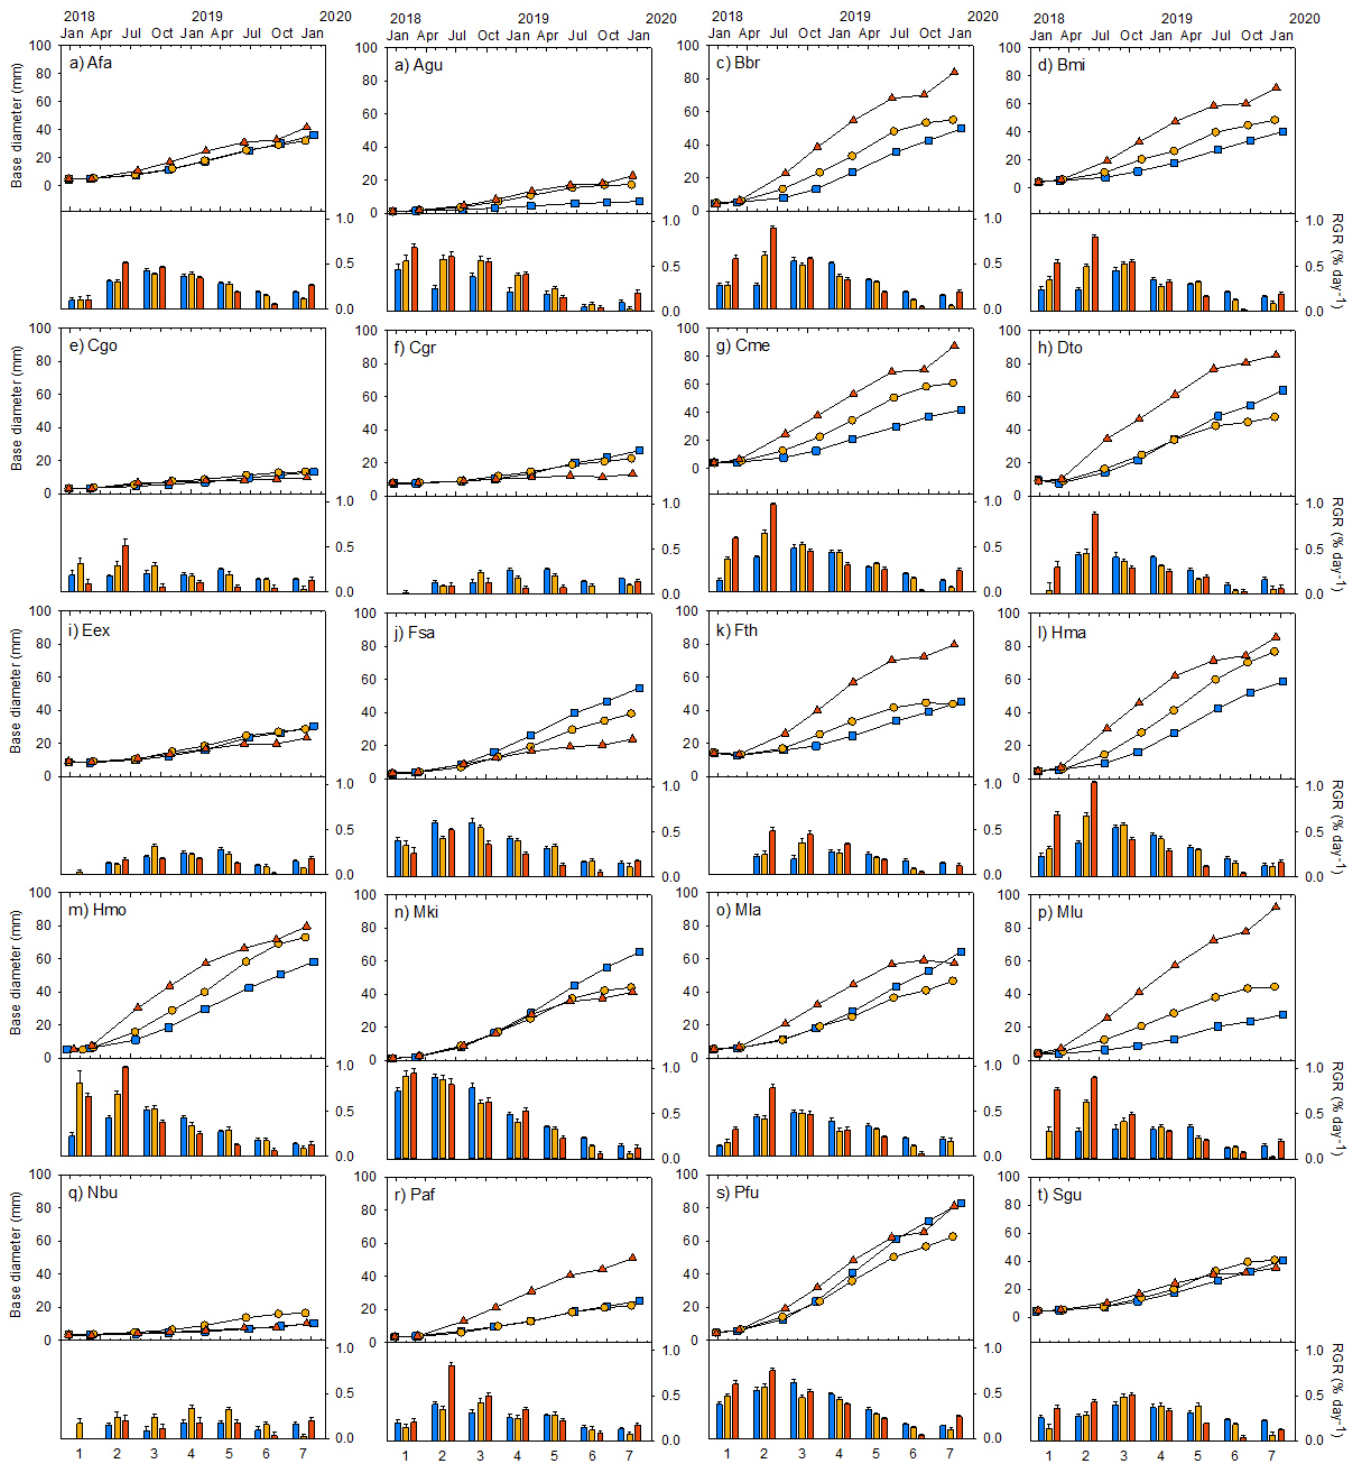

**Figure S6 a-t.** The development of the stem base diameter measured every third month over two years and the relative growth rate (RGR) between measurement intervals for 20 species grown at three sites along an elevation gradient (High, blue square/bar; Mid, orange circle/bar; Low, red triangle/bar). Each marker and bar show site level mean, including standard errors for bars. Full species names are given in Table 2.

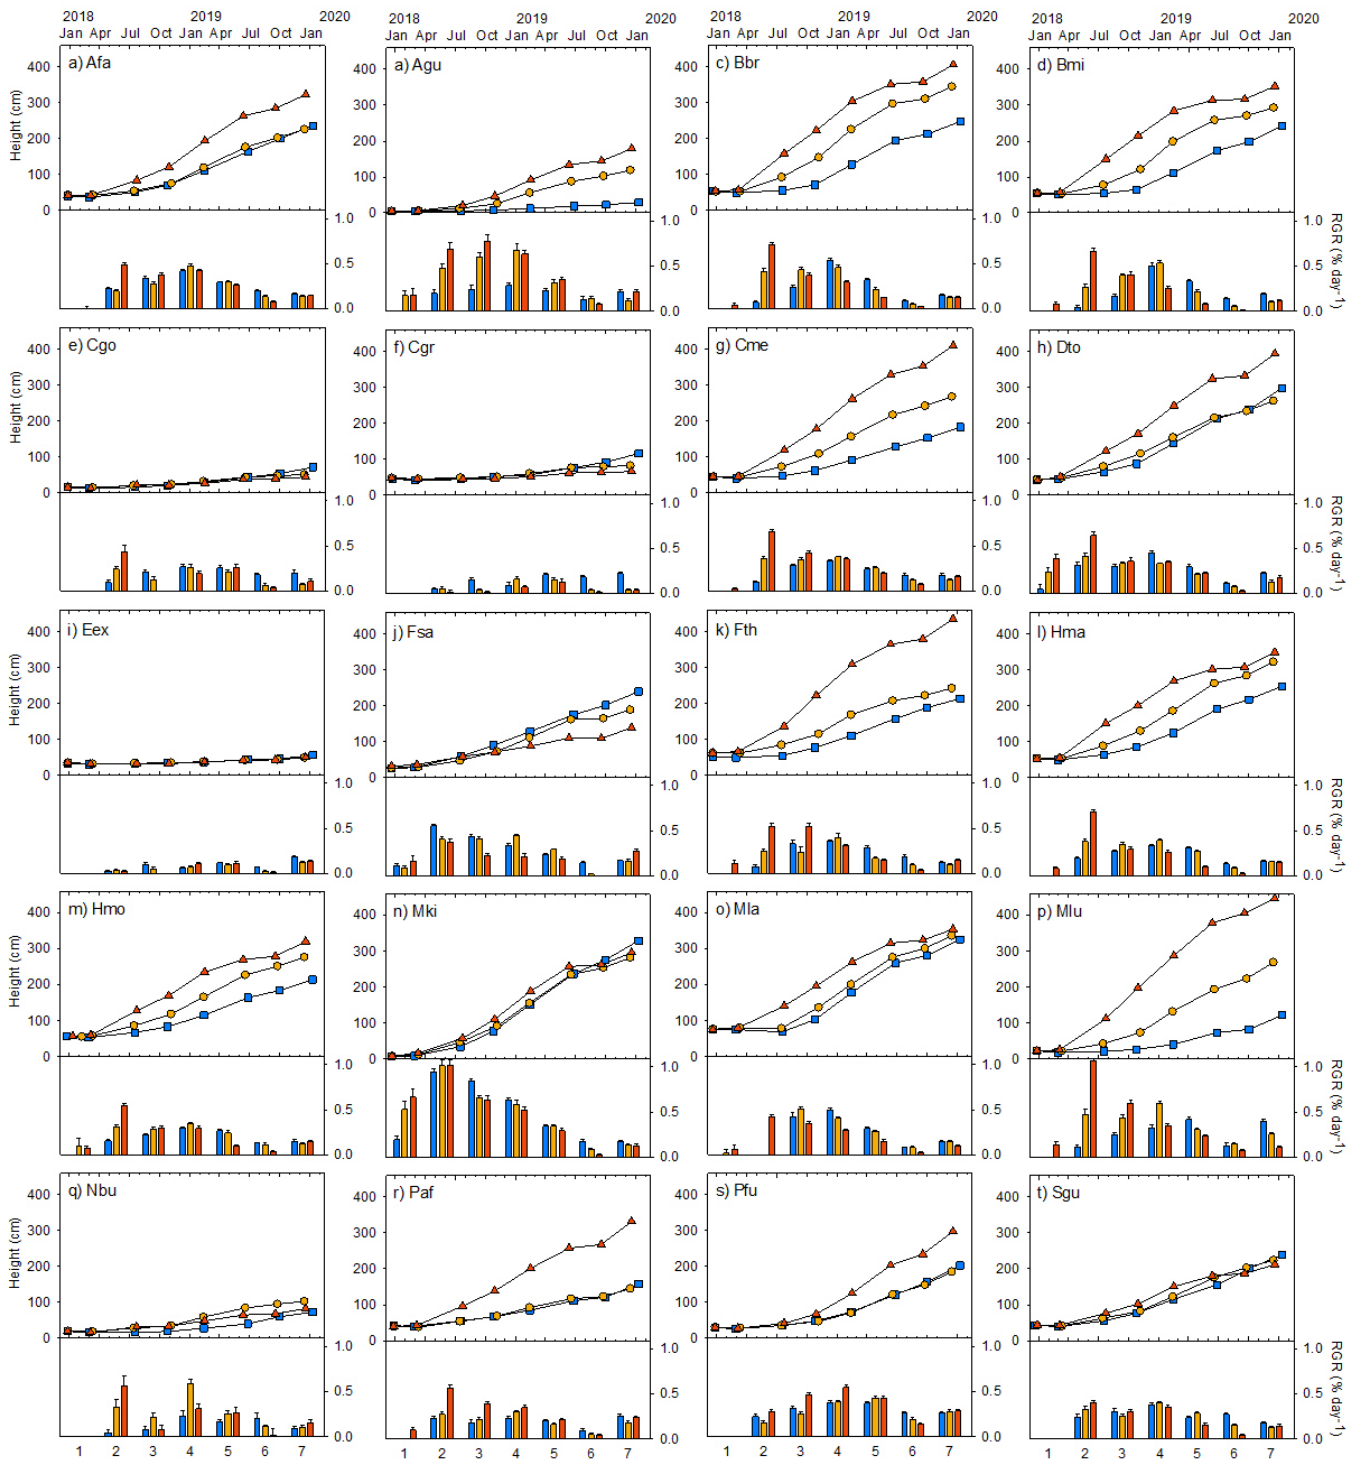

**Figure S7 a-t.** The development of the stem height measured every third month over two years and the relative growth rate (RGR) between measurement intervals for 20 species grown at 3 sites along an elevation gradient (High, blue square/bar; Mid, orange circle/bar; Low, red triangle/bar). Each marker and bar show site level mean, including standard errors for bars. Full species names are given in Table 2.
